# Supplementary material for: Integrated Genotyping Strategies Uncovering Detailed Haplotype Structures and Characterization of DMD duplications
Source: Research Square preprint supplement (doi:10.21203/rs.3.rs-6126136/v1), 2025-03-11
Supplement: Supplementary file 1 [file 21df8951155b7131370455e6.xlsx]

## Sheet: Table S2
Sample	Family ID	Gender	Age at Detection	Age at Follow-up	Phenotype	Treatment	SV Origin	Family History	Diagnosis	Brith Date	Detection Date	Follow-up	MLPA	WES	WGS	OGM	Genotype	Duplication Pattern	Duplication Range	Duplication Length (bp)	Predict Haplotype by WGS and Phenotype	OGM Results	Verified Haplotype	Predict Effect on DMD ORF
WGS01	F_1	Male	7.1	-	Motor Function (7.1 years old): Frequent tripping while walking; Difficulty standing up from a squat. Muscle Findings: Positive Gower's sign; Calf hypertrophy. Laboratory Results: CK-MB: 729↑; CK: >6400↑.	-	Maternal	Positive	DMD	2010.10.07	2017.10.31	-	exon2	-	DMD:intron2ins[exon2]dup	-	E2	Tandem-Dup	intra-DMD	140673	DMD:intron2ins[exon2]dup	-	DMD:intron2ins[exon2]dup	frameshift
WGS02	F_2	Male	8.3	-	Motor Function (8.3 years old): Difficulty climbing stairs; Difficulty standing up from a squat; Slow running; Began walking independently at 17 months. Muscle Findings: Positive Gower's sign. Laboratory Results: CK: >6400; CK-MB: 238.80.	-	Maternal	Positive	DMD	2012.01.01	2020.04.07	-	exon2	-	DMD:intron2ins[exon2]dup	-	E2	Tandem-Dup	intra-DMD	253913	DMD:intron2ins[exon2]dup	-	DMD:intron2ins[exon2]dup	frameshift
WGS03	F_3	Male	3.1	6.4	Symptoms (3.1 years old): Vomiting; Abnormal liver function. Laboratory Findings: Elevated CK (>6400 U/L); Elevated CK-MB (288.60 μg/L); Elevated liver enzymes. Muscle Findings: Bilateral calf hypertrophy. Neurological and Motor Function: Abnormal electromyography (EMG) indicating myogenic damage; Difficulty climbing stairs; Gower's sign; Symptoms (6.4 years old): difficulty in walking.	Steroid Use: Started taking steroids at 4.5 years old, at an equivalent dose of 2.5-3 tablets of prednisone. Calcium Supplementation: 300 mg daily. Vitamin D Supplementation: 600 IU daily.	Maternal	Negative	DMD	2017.12.25	2021.02.10	2024.5	exon2-18	exon2-18	DMD:intron18ins[exon2-18]dup	-	E2-18	Tandem-Dup	intra-DMD	655518	DMD:intron18ins[exon2-18]dup	-	DMD:intron18ins[exon2-18]dup	frameshift
WGS04	F_4	Male	2	-	Motor Function(2 years old): Normal. Language Development: Limited to speaking only a few words. Laboratory Findings: CK: 9550; CK-MB: 244.	-	Unavailable	Unavailable	DMD	2015.12.01	2017.11.23	-	exon3-4	-	DMD:intron4ins[exon3-4]dup	-	E3-4	Tandem-Dup	intra-DMD	112985	DMD:intron4ins[exon3-4]dup	-	DMD:intron4ins[exon3-4]dup	in-frame
WGS05	F_5	Male	10	16	Laboratory Findings: CK-MB: 222; CK: >6400. Motor Function (10 years old): Abnormal gait; Difficulty standing up from a squat. Muscle Findings: Calf hypertrophy. Follow-up (16 years old): Able to walk but significantly worsened compared to 10 years old.	-	Unavailable	Negative	DMD	2008.04.27	2018.05.11	2024.5	exon3-4	-	DMD:intron4ins[exon3-4]dup	-	E3-4	Tandem-Dup	intra-DMD	23287	DMD:intron4ins[exon3-4]dup	-	DMD:intron4ins[exon3-4]dup	in-frame
WGS06	F_6	Male	11.9	-	Motor Function: Abnormal gait; Gower's sign. Muscle Findings: Bilateral calf hypertrophy; Quadriceps strength reduced to Grade II; Bilateral Achilles tendon contractures. Laboratory Findings: CK: 11245 U/L; CK-MB: Elevated; ALT: Elevated; AST: Elevated.	-	Maternal	Positive	DMD	2012.01.23	2023.12.21	-	-	exon3-6	DMD:intron6ins[exon3-6]dup	-	E3-6	Dup-Nor-Dup	intra-DMD	63245	DMD:intron6ins[exon3-6]dup	-	DMD:intron6ins[exon3-6]dup	frameshift
WGS07	F_7	Male	3.2	-	Motor Function: Frequent tripping while walking. Positive Gower's sign. Calf hypertrophy. Laboratory Findings: CK: 29472; ALT: 572; AST: 474.	-	Unavailable	Unavailable	DMD	2016.08.03	2019.10.25	-	exon3-6	-	DMD:intron6ins[exon3-6]dup	-	E3-6	Tandem-Dup	intra-DMD	80557	DMD:intron6ins[exon3-6]dup	-	DMD:intron6ins[exon3-6]dup	frameshift
WGS08	F_8	Male	5.9	-	Motor Function: Bilateral lower limb weakness for 2-3 years; Unable to climb stairs; Progressive loss of strength, inability to jump, waddling gait, and difficulty climbing stairs (requires support); Positive Gower's sign; Weak patellar reflexes; Progressive calf hypertrophy and inability to walk. Laboratory Findings: CK-MB: Elevated;	-	Unavailable	Negative	DMD	2013.09.16	2019.07.25	-	exon3-7	-	DMD:intron7ins[exon3-7]dup	-	E3-7	Tandem-Dup	intra-DMD	130703	DMD:intron7ins[exon3-7]dup	-	DMD:intron7ins[exon3-7]dup	frameshift
WGS09	F_9	Male	4.9	12.4	Motor Function: Difficulty climbing stairs; Unable to jump with both feet; Gower's sign; Mild gross motor delay; Walking on tiptoes observed during follow-up in May 2024 (12.4 years old). Muscle Findings: calf hypertrophy. Laboratory Findings: CK-MB: Elevated;	Steroid Therapy: Prednisone.	Maternal	Unavailable	DMD	2011.12.01	2016.11.03	2024.5	-	exon4-45	DMD:intron45ins[exon5-45]dup	-	E5-45	Tandem-Dup	intra-DMD	884245	DMD:intron45ins[exon5-45]dup	-	DMD:intron45ins[exon5-45]dup	frameshift
WGS10	F_10	Male	8.9	10.7	Motor Function: Difficulty climbing stairs. Laboratory Findings: CK: 5000-6000.	No treatment yet	Unavailable	Unavailable	BMD	2013.08.28	2022.08.03	2024.5	exon28-43dup; exon8-9dup	-	DMD:intron43ins[exon8-9, 28-43] or DMD:intron9ins[exon28-43, 8-9]dup	﻿46,Y,dup(X)(p21.1p21.1), ﻿﻿ogm[GRCh38] dup(X)(p21.1p21.1)(32274519_32446988), ﻿ogm[GRCh38] dup(X)(p21.1p21.1)(32678419_32764627)	E8-9, 28-43	Dup-Nor-Dup	intra-DMD	261337	DMD:intron43ins[exon8-9, 28-43] or DMD:intron9ins[exon28-43, 8-9]dup	DMD:intron43ins[exon8-9, 27-43] or DMD:intron43ins[exon8-9, 28-43]	DMD:intron43ins[exon8-9, 28-43]	in-frame
WGS11	F_11	Male	7	-	Motor Function (7 years old): Unsteady walking; Falls frequently and cannot get up independently. Gower's sign. Muscle Findings: calf hypertrophy. Laboratory Findings: CK: 16044; CK-MB: 274.	-	Maternal	Positive	DMD	2010.02.25	2017.03.08	-	exon8-9	-	DMD:intron9ins[exon8-9]dup	-	E8-9	Tandem-Dup	intra-DMD	88874	DMD:intron9ins[exon8-9]dup	-	DMD:intron9ins[exon8-9]dup	frameshift
WGS12	F_12	Male	6	8.3	Motor Function: 2022.1.24 (6 years old): Calf hypertrophy; Positive Gower's sign; Difficulty climbing stairs; Requires assistance for walking. Started walking independently at 18 months. 2024.5 (8.3 years old): Requires assistance while walking. Laboratory Findings: CK: 13500.0; CK-MB: 297.8.	Steroid Therapy	Maternal	Negative	DMD	2016.01.24	2022.01.29	2024.5	-	exon8-13	DMD:intron13ins[exon8-13]dup	-	E8-13	Tandem-Dup	intra-DMD	204841	DMD:intron13ins[exon8-13]dup	-	DMD:intron13ins[exon8-13]dup	frameshift
WGS13	F_13	Male	8.9	16.5	Motor Function: Unsteady walking; Gower's sign. Loss of ambulation (16.5 years old). Muscle Findings: calf hypertrophy. Laboratory Findings: CK-MB: 775; CK: >6400.	No treatment yet	Maternal	Positive	DMD	2007.10.19	2016.08.25	2024.5	-	exon8-44	DMD:intron44ins[exon8-44]dup	-	E8-44	Dup-Nor-Dup	intra-DMD	672361	DMD:intron44ins[exon8-44]dup	-	DMD:intron44ins[exon8-44]dup	frameshift
WGS14	F_14	Male	6.1	9.3	Symptoms: Snoring observed prior to surgery. Laboratory Findings: Elevated liver enzymes: ALT: 103; AST: 216. CK: Elevated. CK-MB: 291. Motor Function: Difficulty climbing stairs, Gower's sign (6.1 years old). Muscle Findings: calf hypertrophy. Follow-up (9.3 years old): Loss of ambulation.	Rehabilitation Therapy	Maternal	Unavailable	DMD	2015.01.26	2021.02.26	2024.5	exon12-30	exon12-30	DMD:intron30ins[exon12-30]dup	-	E12-30	Tandem-Dup	intra-DMD	234406	DMD:intron30ins[exon12-30]dup	-	DMD:intron30ins[exon12-30]dup	frameshift
WGS16	F_15	Male	4.4	6.9	Laboratory Findings: CK: 13720; CK-MB: 306; LDH: 924; ALT: 193; AST: 266. Follow-up (6.9 years old): Normal gross motor abilities.	-	Unavailable	Negative	BMD	2017.06.01	2021.10.12	2024.5	-	exon16-18	DMD:intron18ins[exon16-18]dup	-	E16-18	Tandem-Dup	intra-DMD	63028	DMD:intron18ins[exon16-18]dup	-	DMD:intron18ins[exon16-18]dup	in-frame
WGS17	F_16	Male	8.5	-	Muscle Findings: Calf hypertrophy. Motor Function: Difficulty squatting and standing up; Trouble climbing stairs.	-	Unavailable	Unavailable	DMD	2010.01.23	2018.07.19	-	exon18-44	-	DMD:intron44ins[(PRRG1:exon2-4, LANCL3:exon1-5, XK:exon1-2)INV;exon18-44]dup or XK:intron2ins[(DMD:exon18-44)INV;PRRG1:exon2-4, LANCL3:exon1-5, XK:exon1-2]dup or chrX:32524074-37394262delins[(chrX:31982991-37705331)INV]	-	E18-44	Dup-Inv-Dup	out-of-DMD	852152	DMD:intron44ins[(PRRG1:exon2-4, LANCL3:exon1-5, XK:exon1-2)INV;exon18-44]dup or chrX:32524074-37394262delins[(chrX:31982991-37705331)INV]	-	-	extragenic-insert
WGS18	F_17	Female	2.6	3.3	Medical History: Intestinal infection; Suspected pancreatitis. Follow-up (3.3 years old): Normal gross motor abilities. Laboratory Findings: CK: 52 U/L (within normal range).	-	Maternal	Negative	Female Carrier	2021.01.15	2023.08.10	2024.5	-	exon25-44	DMD:intron44ins[exon24-44]dup	-	E24-44	Tandem-Dup	intra-DMD	451374	DMD:intron44ins[exon24-44]dup	-	DMD:intron44ins[exon24-44]dup	in-frame
WGS19	F_18	Female	38.3	-	Prenatal Diagnosis	-	Unavailable	Unavailable	Female Carrier	1986.01.17	2024.04.19	-	exon31-33	-	DMD:intron33ins[exon31-33]dup or DMD:exon34ins[(exon31-33)INV]dup or DMD:intron33ins[(exon31-33)INV]	-	E31-33	Dup-Inv-Dup	intra-DMD	10725	-	-	-	unknown
WGS20	F_19	Male	3	-	Motor Function: Walked independently at 16 months. Walking unsteady and frequent falls. Walks on tiptoes. Gower's Sign. Calf Muscle Hypertrophy. Urinary and Bowel Function: Incontinence of both urine and stool. Laboratory Findings: Elevated liver enzymes at birth; CK: 1812.6; CK-MB: 56.20; ALT: 112.20; AST: 78.30.	-	Unavailable	Negative	DMD	2017.06.21	2020.07.02	-	exon34	-	DMD:intron34ins[exon34]dup	-	E34	Tandem-Dup	intra-DMD	11453	DMD:intron34ins[exon34]dup	-	DMD:intron34ins[exon34]dup	in-frame
WGS21	F_20	Male	8	-	Elevated Muscle Enzymes	-	Maternal	Unavailable	BMD	2015.06.08	2023.06.01	-	-	exon43-44	DMD:intron44ins[exon43-44]dup	-	E43-44	Tandem-Dup	intra-DMD	128345	DMD:intron44ins[exon43-44]dup	-	DMD:intron44ins[exon43-44]dup	in-frame
WGS22	F_21	Female	37	-	Son's phenotype: Motor Function: Gait abnormalities started after walking independently, with a right leg limp progressing over time. Onset of symptoms between 1-2 years of age, with worsening instability and frequent falls. loss of ambulation, significant lower limb contractures and muscle atrophy (12.3 years old). Laboratory Findings: CK-MB: 440.3; LDH: 3638; Elevated CK levels. Electrophysiolo…	-	Unavailable	Positive	Female Carrier	-	2022.02.11	2024.5	exon45-48dup; exon49-52del	-	[DMD:exon45-48]dup	-	E45-48	Intricate-Dup	intra-DMD	unknown	-	-	-	unknown
WGS23	F_22	Male	4	8.4	Motor Function: Difficulty climbing stairs; Difficulty standing up from a squat (4 years old); Calf hypertrophy; Laboratory Findings: CK: >6400; Follow-up (8.4 years old): Physical activity and walking are manageable.	Steroid Therapy	Maternal	Negative	DMD	2015.11.23	2019.11.25	2024.5	exon44-50	-	DMD:intron50ins[DMD:exon44-50]dup or DMD:intron42ins[(DMD:exon44-50)INV]dup or DMD:exon43delins[(DMD:exon43-50)INV]	﻿46,Y,dup(X)(p21.1p21.1), ﻿ogm[GRCh38] dup(X)(p21.1p21.1)(31806603_32282255)	E44-50	Dup-Inv-Dup	intra-DMD	490794	DMD:intron50ins[DMD:exon44-50]dup or DMD:exon43delins[(DMD:exon43-50)INV]	DMD:intron50ins[DMD:exon44-50]dup	DMD:intron50ins[DMD:exon44-50]dup	frameshift
WGS24	F_23	Male	7.7	-	Motor Weakness: Difficulty ascending stairs. Support required to stand up after squatting. Muscle Findings: calf hypertrophy.	-	Maternal	Positive	DMD	2011.12.21	2019.09.09	-	exon44-55	-	DMD:intron55ins[exon44-55]dup	-	E44-55	Tandem-Dup	intra-DMD	600137	DMD:intron55ins[exon44-55]dup	-	DMD:intron55ins[exon44-55]dup	frameshift
WGS25	F_24	Male	4.7	5.2	Muscle Findings: Calf hypertrophy. Motor Function: Walking independently after the age of 2 years; Prone to frequent falls; Gower’s Sign; Laboratory Findings: ALT: 513 U/L; AST: 252 U/L; CK: 7844 U/L; CK-MB: 308 U/L; LDH: 1382 U/L. Clinical Observations: Gait abnormalities characterized by unsteadiness and reduced stamina. Follow-up (5.2 years old): able to climb stairs and jump, but walking is s…	Rehabilitation Therapy, Steroid Therapy, Calcium Supplementation.	Maternal	Positive	DMD	2019.02.25	2023.10.30	2024.05	-	exon45-51	DMD:intron51ins[CFAP47:exon57-64, exon45-51]dup or CFAP47:downstreamins[DMD:exon45-51, CFAP47:exon57-64]dup	﻿46,Y,dup(X)(p21.1p21.1), ﻿ogm[GRCh38] fus(X;X)(p21.1;p21.1)(31750770;36593074), ﻿ogm[GRCh38] dup(X)(p21.1p21.1)(31750770_32062533), ﻿ogm[GRCh38] dup(X)(p21.1p21.1)(36317240_36593074)	E45-51	Dup-Nor-Dup	out-of-DMD	598974	DMD:intron51ins[CFAP47:exon57-64, exon45-51]dup	DMD:intron51ins[CFAP47:exon57-64, exon45-51]dup	DMD:intron51ins[CFAP47:exon57-64, exon45-51]dup	extragenic-insert
WGS26	F_25	Male	7.6	12	Muscle Findings: calf hypertrophy. Motor Function: Walking independently at 13 months of age. Persistent gait instability for over a year, prone to frequent falls. Requires assistance to climb stairs and difficulty standing from a squatting position. Cognitive and Learning: Moderate intellectual disability. Skeletal Findings: Mild lumbar scoliosis observed, along with abnormal posture. Laboratory…	Rehabilitation Therapy, Traditional Chinese Medicine (TCM), Steroid Therapy	Maternal	Positive	DMD	2014.11.30	2022.06.28	2024.05	exon45-52	exon45-52	DMD:intron55ins[exon45-52, 55]dup or DMD:intron52ins[exon55, 45-52]dup	-	E45-52, 55	Dup-Nor-Dup	intra-DMD	517520	DMD:intron55ins[exon45-52, 55]dup or DMD:intron52ins[exon55, 45-52]dup	-	-	frameshift
WGS27	F_26	Male	3.5	-	Calf hypertrophy; Gower’s Sign; Difficulty in ambulation; Laboratory Findings: CK: 16930 U/L (significantly elevated). CK-MB: 118.1 ng/mL.	-	Maternal	Negative	DMD	2017.02.24	2020.09.09	-	-	exon45-53	DMD:intron53ins[exon45-52]dup	-	E45-52	Dup-Inv-Dup	intra-DMD	328246	DMD:intron53ins[exon45-52]dup	-	DMD:intron53ins[exon45-52]dup	frameshift
WGS28	F_27	Male	0.2	-	Cardiac Findings: Premature atrial contractions (PAC). Congenital heart defects. Perinatal asphyxia with hypoxic-ischemic myocardial injury. Laboratory results: CK-MB: 130.6 with a peak 600 . CK: 4245 U/L, with a peak >6400 U/L.	Ruanjin, Vitamin C	Unavailable	Unavailable	DMD	2018.07.10	2018.09.12	-	exon45-54	-	DMD:intron54ins[exon45-54]dup	-	E45-54	Tandem-Dup	intra-DMD	371433	DMD:intron54ins[exon45-54]dup	-	DMD:intron54ins[exon45-54]dup	frameshift
WGS29	F_28	Male	18.4	23.7	Calf Muscle Hypertrophy. Motor Impairments: Difficulty with squatting and rising from a seated position. Gower's sign Loss of Ambulation at 23.7.	-	Maternal	Positive	DMD	2000.08.16	2018.12.25	2024.5	exon45-57	-	DMD:intron57ins[chrX:35418217-35548151, exon45-57]dup or chrX:35548151ins[(DMD:45-54)INV]dup or chrX:31988110-35418217delins[(chrX:31483049-35548151)INV]	-	E45-57	Dup-Inv-Dup	out-of-DMD	634995	DMD:intron57ins[chrX:35418217-35548151, exon45-57]dup or chrX:31988110-35418217delins[(chrX:31483049-35548151)INV]	-	-	extragenic-insert
WGS30	F_29	Male	1.9		Elevated CK 22043 U/L. Motor Impairments: Began walking independently at 16 months of age. Walking unsteadly. Gower's Sign. Calf Muscle Hypertrophy.	-	Maternal	Positive	DMD	2017.07.09	2019.05.22	-	-	exon46-49	chrX:28569026ins[(DMD:exon46-49)INV, chrX:28414874-28569026]dup or DMD:intron49ins[(chrX:28414874-28569026)INV, exon46-49]dup or chrX:28569026-31831771delins[(chrX:28414874-31937257)INV]	-	E46-49	Dup-Inv-Dup	out-of-DMD	259638	DMD:intron49ins[(chrX:28414874-28569026)INV, exon46-49]dup or chrX:28569026-31831771delins[(chrX:28414874-31937257)INV]	-	-	extragenic-insert
WGS31	F_30	Male	6	6.7	Motor Function: Difficulty climbing stairs and recovering from falls, requiring considerable effort. Gower's Sign. Gait Abnormalities. Reflexes: Deep tendon reflexes not elicitable. Calf Muscle Hypertrophy: Bilateral enlargement observed. Elevated CK. Follow-up (6.7 years old): Motor function progressive decline, increased instability and frequent falls, requires assistance to climb stairs, Atten…	No treatment yet	Maternal	Unavailable	DMD	2017.08.23	2023.08.28	2024.5	exon46-49	-	[IL1RAPL1:exon1, DMD:46-49]dup	﻿46,Y,der(X)(Xpter→Xp21.1::Xp21.3p21.3::Xp21.1→Xqter), ﻿ogm[GRCh38] dup(X)(p21.3p21.3)(28382937_28281895), ﻿ogm[GRCh38] dup(X)(p21.3p21.3)(28668996_28486473), ﻿ogm[GRCh38] dup(X)(p21.1p21.1)(31832901_31954458)	E46-49	Intricate-Dup	out-of-DMD	411304	-	DMD:intron49ins[(chrX:28281004-28383006)INV, IL1RAPL1:exon1, exon46-49]dup	DMD:intron49ins[(chrX:28281004-28383006)INV, IL1RAPL1:exon1, exon46-49]dup	extragenic-insert
WGS32	F_31	Male	6.5	-	Elevated CK: 1557, Normal Motor Function.	-	Maternal	Unavailable	BMD	2011.03.19	2017.09.01	-	-	exon48-51	DMD:intron51ins[exon48-51]dup	-	E48-51	Tandem-Dup	intra-DMD	146571	DMD:intron51ins[exon48-51]dup	-	DMD:intron51ins[exon48-51]dup	in-frame
WGS33	F_32	Female	11	11.8	Symptoms: Common cold, myocarditis Laboratory Findings: Elevated creatine kinase (CK): Initially 1412 U/L, peaking at over 4000 U/L, followed by a period of normalization. Elevated lactate dehydrogenase (LDH): 360 U/L. Follow-up (11.8 years old): CK levels reduced to approximately 800 U/L. Patient exhibits muscle flaccidity and reduced physical activity. Germinoma in the brain.	Radiation therapy, Prednisone, Levothyroxine (Euthyrox), Medication for managing diabetes insipidus	de novo	Negative	Female BMD	2012.11.07	2023.11.06	2024.8.12	-	exon49-51	DMD:intron51ins[chrY:9647826_9794284, exon49-51]dup or chrY:9794284ins[DMD:exon49-51, chrY:9647826_9794284]	﻿46,X,der(X)dup(X)(p21.1p21.1)ins(X;Y)(p21.1;p11.2p11.2), ﻿ogm[GRCh38] dup(X)(p21.1p21.1)(31747210_31862695), ﻿ogm[GRCh38] dup(Y)(p11.2)(9663023_9774261)	E49-51	Intricate-Dup	out-of-DMD	268243	DMD:intron51ins[chrY:9647826_9794284, exon49-51]dup	DMD:intron51ins[chrY:9647826_9794284, exon49-51]dup	DMD:intron51ins[chrY:9647826_9794284, exon49-51]dup	extragenic-insert
WGS34	F_33	Male	7.3	-	Motor Development: Walked independently at 20 months. Muscle Findings: Calf hypertrophy. Motor Function: Gower's Sign; Difficulty walking. Cognitive and Learning: Poor study performance. Laboratory Findings: CK-MB: 421.7; CK: >6400.	-	Maternal	Positive	DMD	2011.04.05	2018.07.17	-	exon54	-	DMD:intron54ins[exon54]dup	-	E54	Tandem-Dup	intra-DMD	19695	DMD:intron54ins[exon54]dup	-	DMD:intron54ins[exon54]dup	frameshift
WGS35	F_33	Female	20.9	-	-	-	Maternal	Positive	Female Carrier	1998.08.10	2019.07.11	-	exon54	-	DMD:intron54ins[exon54]dup	-	E54	Tandem-Dup	intra-DMD	19695	DMD:intron54ins[exon54]dup	-	DMD:intron54ins[exon54]dup	frameshift
WGS36	F_34	Female	36.9	-	Prenatal Diagnosis	-	Unavailable	Unavailable	Female Carrier	1987.06.05	2024.04.29	-	exon56-61	-	[DMD:56-61]dup	-	E56-61	Intricate-Dup	out-of-DMD	unknown	-	-	-	unknown
WGS37	F_35	Male	14.2	-	Loss of ambulation at 10 years old	-	Maternal	Positive	DMD	2003.08.14	2017.11.08	-	exon56-74	-	DMD:intron74ins[exon56-74]dup	-	E56-74	Tandem-Dup	intra-DMD	374119	DMD:intron74ins[exon56-74]dup	-	DMD:intron74ins[exon56-74]dup	frameshift
WGS38	F_36	Male	7.8	14	Motor Function: Difficulty standing up after squatting; Gower's sign; Difficulty climbing stairs; waddling gait; Calf muscle hypertrophy. Follow-up (14 years old): loss of ambulation.	-	Maternal	Positive	DMD	2010.05.08	2018.03.09	2024.5	exon61	-	DMD:intron61ins[exon61]dup	-	E61	Tandem-Dup	intra-DMD	45742	DMD:intron61ins[exon61]dup	-	DMD:intron61ins[exon61]dup	frameshift
WGS39	F_37	Male	0.7	1.2	Post-Kasai procedure for biliary atresia, post-liver transplantation, right axillary mass, right inguinal hernia. Lactate dehydrogenase 324↑. Follow-up (1.2 years old):Normal CK levels	-	Maternal	Unavailable	asymptomatic male	2023.03.01	2023.11.10	2024.5	-	exon66-79	TAB3:intron7ins[DMD:exon65-79,TAB3:exon1-7]dup	-	E65-79	Tandem-Dup	out-of-DMD	361492	TAB3:intron7ins[DMD:exon65-79,TAB3:exon1-7]dup	-	TAB3:intron7ins[DMD:exon65-79,TAB3:exon1-7]dup	none
WGS40	F_38	Female	30	-	Prenatal Diagnosis; The previous pregnancy was a male fetus with prenatal findings of Tetralogy of Fallot, diaphragmatic hernia, and spinal developmental abnormalities.	-	Maternal	Negative	Female Carrier	-	2024.08.13	-	exon50-55	-	DMD:intron55ins[chrX:33890225-34038113,exon50-55]dup or chrX:34038113ins[DMD:exon50-55, chrX:33890225-34038113]dup	﻿46,X,dup(X)(q21.1q21.1), ﻿ogm[GRCh38] fus(X;X)(p21.1;p21.1)(34033016;31568966), ﻿ogm[GRCh38] dup(X)(p21.1p21.1)(33891302_34033016), ﻿ogm[GRCh38] dup(X)(p21.1p21.1)(﻿31561450_31824145)	E50-55	Dup-Nor-Dup	out-of-DMD	412280	-	chrX:34038113ins[DMD:exon50-55, chrX:33890225-34038113]dup	chrX:34038113ins[DMD:exon50-55, chrX:33890225-34038113]dup	none
