# Supplementary material for: Integrated Genotyping Strategies Uncovering Detailed Haplotype Structures and Characterization of DMD duplications
Source: Research Square preprint supplement (doi:10.21203/rs.3.rs-6126136/v1), 2025-03-11
Supplement: Supplementary file 2 [file 91d001b2d605a6f1ba455d06.xlsx]

## Sheet: Table S6
Duplicated Exons on DMD	Sample 1	WES/MLPA	WGS Results 2	Predict Haplotype by WGS and Phenotype	OGM results	Verified Haplotype	Predict Effect on DMD ORF	Phenotype in Our Cohort	Phenotype in LOVD with Corresponding Genotype
E2	WGS01, 02	Exon2	DMD:intron2ins[Exon2]dup	DMD:intron2ins[Exon2]dup	-	DMD:intron2ins[Exon2]dup	frameshift	DMD	347 (130 DMD; 8 BMD; 207 DMD/BMD; 2 female carrier)
E2-18	WGS03	Exon2-18	DMD:intron18ins[Exon2-18]dup	DMD:intron18ins[Exon2-18]dup	-	DMD:intron18ins[Exon2-18]dup	frameshift	DMD	3 (2 DMD; 1 DMD/BMD)
E3-4	WGS04, 05	Exon3-4	DMD:intron4ins[Exon3-4]dup	DMD:intron4ins[Exon3-4]dup	-	DMD:intron4ins[Exon3-4]dup	inframe	DMD	51 (11 DMD; 7 BMD; 32 DMD/BMD; 1 female carrier)
E3-6	WGS06, 07	Exon3-6	DMD:intron6ins[Exon3-6]dup	DMD:intron6ins[Exon3-6]dup	-	DMD:intron6ins[Exon3-6]dup	frameshift	DMD	22 (13 DMD; 2 BMD; 7 DMD/BMD)
E3-7	WGS08	Exon3-7	DMD:intron7ins[Exon3-7]dup	DMD:intron7ins[Exon3-7]dup	-	DMD:intron7ins[Exon3-7]dup	frameshift	DMD	113 (45 DMD; 3 BMD; 61 DMD/BMD; 1 asymptomatic male; 3 female carriers)
E5-45	WGS09	Exon4-45	DMD:intron45ins[Exon5-45]dup	DMD:intron45ins[Exon5-45]dup	-	DMD:intron45ins[Exon5-45]dup	frameshift	DMD	0
E8-9	WGS11	Exon8-9	DMD:intron9ins[Exon8-9]dup	DMD:intron9ins[Exon8-9]dup	-	DMD:intron9ins[Exon8-9]dup	frameshift	DMD	86 (48 DMD; 1 BMD; 36 DMD/BMD; 1 symptomatic female carrier)
E8-13	WGS12	Exon8-13	DMD:intron13ins[Exon8-13]dup	DMD:intron13ins[Exon8-13]dup	-	DMD:intron13ins[Exon8-13]dup	frameshift	DMD	29 (19 DMD; 10 DMD/BMD;)
E8-9; E28-43	WGS10	Exon8-9, 28-43	DMD:intron43ins[Exon8-9, 28-43] or DMD:intron9ins[Exon28-43, 8-9]dup	-	DMD:intron43ins[Exon8-9, 28-43] or DMD:intron43ins[Exon8-9, 27-43]	DMD:intron43ins[Exon8-9, 28-43]	inframe	BMD	0
E8-44	WGS13	Exon8-44	DMD:intron44ins[Exon8-44]dup	DMD:intron44ins[Exon8-44]dup	-	DMD:intron44ins[Exon8-44]dup	frameshift	DMD	11 (6 DMD; 5 DMD/BMD)
E12-30	WGS14	Exon12-30	DMD:intron30ins[Exon12-30]dup	DMD:intron30ins[Exon12-30]dup	-	DMD:intron30ins[Exon12-30]dup	frameshift	DMD	4 (2 DMD; 2 DMD/BMD)
E16-18	WGS16	Exon16-18	DMD:intron18ins[Exon16-18]dup	DMD:intron18ins[Exon16-18]dup	-	DMD:intron18ins[Exon16-18]dup	inframe	BMD	3 (2 BMD; 1 female carrier)
E18-44	WGS17	exon18-44	DMD:intron44ins[(PRRG1:exon2-4, LANCL3:exon1-5, XK:exon1-2)INV;exon18-44]dup or XK:intron2ins[(DMD:exon18-44)INV;PRRG1:exon2-4, LANCL3:exon1-5, XK:exon1-2]dup or chrX:32524074-37394262delins[(chrX:31982991-37705331)INV]	DMD:intron44ins[(PRRG1:exon2-4, LANCL3:exon1-5, XK:exon1-2)INV;exon18-44]dup or chrX:32524074-37394262delins[(chrX:31982991-37705331)INV]	-	-	extragenic-insert	DMD	7 (6 DMD; 1 DMD/BMD)
E24-44	WGS18	Exon25-44	DMD:intron44ins[Exon24-44]dup	DMD:intron44ins[Exon24-44]dup	-	DMD:intron44ins[Exon24-44]dup	inframe	female carrier	0
E31-33	WGS19	Exon31-33	DMD:intron33ins[Exon31-33]dup or DMD:Exon34ins[(Exon31-33)INV]dup or DMD:intron33ins[(Exon31-33)INV]	-	-	-	unknown	female carrier	0
E34	WGS20	Exon34	DMD:intron34ins[Exon34]dup	DMD:intron34ins[Exon34]dup	-	DMD:intron34ins[Exon34]dup	inframe	DMD	2 (2 DMD)
E43-44	WGS21	Exon43-44	DMD:intron44ins[Exon43-44]dup	DMD:intron44ins[Exon43-44]dup	-	DMD:intron44ins[Exon43-44]dup	inframe	BMD	4 (1 DMD; 1 BMD; 2 DMD/BMD)
E45-48	WGS22	Exon45-48dup; Exon49-52del	[DMD:Exon45-48]dup	-	-	-	unknown	female carrier	4 (2 BMD; 2 DMD/BMD)
E44-50	WGS23	Exon44-50	DMD:intron50ins[DMD:Exon44-50]dup or DMD:intron42ins[(DMD:Exon44-50)INV]dup or DMD:Exon43delins[(DMD:Exon43-50)INV]	DMD:intron50ins[Exon44-50]dup or DMD:Exon43delins[(DMD:Exon43-50)INV]	DMD:intron50ins[Exon44-50]dup	DMD:intron50ins[Exon44-50]dup	frameshift	DMD	3 (2 DMD; 1 DMD/BMD)
E44-55	WGS24	Exon44-55	DMD:intron55ins[Exon44-55]dup	DMD:intron55ins[Exon44-55]dup	-	DMD:intron55ins[Exon44-55]dup	frameshift	DMD	5 (3 DMD; 2 DMD/BMD)
E45-51	WGS25	exon45-51	DMD:intron51ins[CFAP47:exon57-64, exon45-51]dup or CFAP47:downstreamins[DMD:exon45-51, CFAP47:exon57-64]dup	DMD:intron51ins[CFAP47:exon57-64, exon45-51]dup	DMD:intron51ins[CFAP47:exon57-64, exon45-51]dup	DMD:intron51ins[CFAP47:exon57-64, exon45-51]dup	extragenic-insert	DMD	13 (6 DMD; 2 BMD; 3 DMD/BMD; 1 asymptomatic male ; 1 female carrier)
E45-52; E55	WGS26	Exon45-52	DMD:intron55ins[Exon45-52, 55]dup or DMD:intron52ins[Exon55, 45-52]dup	DMD:intron55ins[Exon45-52, 55]dup or DMD:intron52ins[Exon55, 45-52]dup	-	-	frameshift	DMD	0
E45-52	WGS27	Exon45-53	DMD:intron53ins[Exon45-52]dup	DMD:intron53ins[Exon45-52]dup	-	DMD:intron53ins[Exon45-52]dup	frameshift	DMD	20 (7 DMD; 13 DMD/BMD)
E45-54	WGS28	Exon45-54	DMD:intron54ins[Exon45-54]dup	DMD:intron54ins[Exon45-54]dup	-	DMD:intron54ins[Exon45-54]dup	frameshift	DMD	9 (8 DMD; 1 DMD/BMD)
E45-57	WGS29	exon45-57	DMD:intron57ins[chrX:35418217-35548151, exon45-57]dup or chrX:35548151ins[(DMD:45-54)INV]dup or chrX:31988110-35418217delins[(chrX:31483049-35548151)INV]	DMD:intron57ins[chrX:35418217-35548151, exon45-57]dup	-	DMD:intron57ins[chrX:35418217-35548151, exon45-57]dup	extragenic-insert	DMD	2 (2 DMD/BMD)
E46-49	WGS30	exon46-49	chrX:28569026ins[(DMD:exon46-49)INV, chrX:28414874-28569026]dup or DMD:intron49ins[(chrX:28414874-28569026)INV, exon46-49]dup or chrX:28569026-31831771delins[(chrX:28414874-31937257)INV]	DMD:intron49ins[(chrX:28414874-28569026)INV, exon46-49]dup or chrX:28569026-31831771delins[(chrX:28414874-31937257)INV]	-	-	extragenic-insert	DMD	5 (4 DMD; 1 DMD/BMD)
	WGS31		[chrX:28281004-28383006, IL1RAPL1:exon1, DMD:46-49]dup	-	DMD:intron49ins[(chrX:28281004-28383006)INV, IL1RAPL1:exon1, exon46-49]dup	DMD:intron49ins[(chrX:28281004-28383006)INV, IL1RAPL1:exon1, exon46-49]dup	extragenic-insert	DMD
E48-51	WGS32	exon48-51	DMD:intron51ins[exon48-51]dup	DMD:intron51ins[exon48-51]dup	-	DMD:intron51ins[exon48-51]dup	inframe	BMD	0
E49-51	WGS33	exon49-51	DMD:intron51ins[chrY:9647826_9794284, exon49-51]dup or chrY:9794284ins[DMD:exon49-51, chrY:9647826_9794284]	DMD:intron51ins[chrY:9647826_9794284, exon49-51]dup	DMD:intron51ins[chrY:9647826_9794284, exon49-51]dup	DMD:intron51ins[chrY:9647826_9794284, exon49-51]dup	extragenic-insert	femal BMD	1 (1 DMD)
E54	WGS34	Exon54	DMD:intron54ins[Exon54]dup	DMD:intron54ins[Exon54]dup	-	DMD:intron54ins[Exon54]dup	frameshift	DMD	7 (4 DMD; 1 BMD; 2 DMD/BMD)
E56-61	WGS36	Exon56-61	[DMD:56-61]dup	-	-	-	unknown	female carrier	10 (6 DMD; 1 BMD; 2 DMD/BMD; 1 female carrier)
E56-74	WGS37	Exon56-74	DMD:intron74ins[Exon56-74]dup	DMD:intron74ins[Exon56-74]dup	-	DMD:intron74ins[Exon56-74]dup	frameshift	DMD	5 (2 DMD; 1 BMD; 2 DMD/BMD)
E61	WGS38	Exon61	DMD:intron61ins[Exon61]dup	DMD:intron61ins[Exon61]dup	-	DMD:intron61ins[Exon61]dup	frameshift	DMD	11 (6 DMD; 4 DMD/BMD; 1 female carrier)
E65-79	WGS39	Exon66-79	TAB3:intron7ins[DMD:Exon65-79,TAB3:Exon1-7]dup	TAB3:intron7ins[DMD:Exon65-79,TAB3:Exon1-7]dup	-	TAB3:intron7ins[DMD:Exon65-79,TAB3:Exon1-7]dup	none	asymptomatic male	2 (1 DMD; 1 asymptomatic male)
E50-55	WGS40	Exon50-55	DMD:intron55ins[chrX:33890225-34038113,Exon50-55]dup or chrX:34038113ins[DMD:Exon50-55, chrX:33890225-34038113]dup	-	chrX:34038113ins[DMD:Exon50-55, chrX:33890225-34038113]dup	chrX:34038113ins[DMD:Exon50-55, chrX:33890225-34038113]dup	none	female carrier	17 (12 DMD; 1 BMD; 4 DMD/BMD)
1 "blue filled color" represent WGS-unsolved cases. 2 The results of WGS showed all potential structures of duplications, containing both duplication location, dupliction segment and direction, for example "TAB3:intron7ins[DMD:Exon65-79,TAB3:Exon1-7]dup" means duplication segment DMD:Exon65-79,TAB3:Exon1-7 is inserted into TAB3:intron7; "DMD:Exon34ins[(Exon31-33)INV]dup" means duplications segmen…
