# Supplementary material for: Integrated Genotyping Strategies Uncovering Detailed Haplotype Structures and Characterization of DMD duplications
Source: Research Square preprint supplement (doi:10.21203/rs.3.rs-6126136/v1), 2025-03-11
Supplement: Supplementary file 3 [file efad93c5486cb91eddd32650.xlsx]

## Sheet: Table S4
Breakpoint Pair ID	Sample	Genomic Position		DMD Gene Annotation		Meiosis DSB Hotspots		Repeats Annotation		GC content (-100 bp ~ 100 bp)		Breakpoints Sequence			Homology Ratio	Read Orientation
		5'	3'	5'	3'	5'	3'	5'	3'	5'	3'	Breakpoints Sequence 1	Homology Length (bp)	Insertion Length (no templete) (bp)
1_1	WGS01	33010110	33150783	intron2	intron1			(AT)n(+)	L2a(+)	0.275	0.375	ins gac	0	3	0.66	- +
2_1	WGS02	32919497	33173410	intron2	intron1			-	-	0.29	0.285	hom AAGT	4	0	0.68	- +
3_1	WGS03	32517892	33173410	intron18	intron1			-	-	0.315	0.285	ins tt	0	2	0.68	- +
4_1	WGS04	32842061	32955046	intron4	intron2	Y		L1ME3A(-)	L1PA13(-)	0.375	0.39	ins taataga	0	7	0.65	- +
5_1	WGS05	32842313	32865600	intron4	intron2	Y		-	-	0.47	0.43	hom ACC	3	0	0.65	- +
6_1	WGS06	32810298	32880122	intron6	intron2			L2a(+)	-	0.345	0.39	hom GC	2	0	0.67	- +
6_2	WGS06	32816659	32823238	intron5	intron5			-	-	0.34	0.355	hom AATT	4	0	0.68	+ -
7_1	WGS07	32814150	32894707	intron6	intron2			-	LTR32(-)	0.31	0.47	ins attcagg	0	7	0.65	- +
8_1	WGS08	32808670	32939373	intron7	intron2			-	MER45B(+)	0.35	0.325	hom TT	2	0	0.67	- +
9_1	WGS09	31964755	32849000	intron45	intron3			L1MC5a(+)	(TG)n(+)	0.3	0.4	hom TGT	3	0	0.68	- +
10_1	WGS10	32275575	32765682	intron43	intron7			-	L1MB3(-)	0.3	0.355	hom TTCA	4	0	0.67	- +
10_2	WGS10	32447885	32676655	intron27	intron9	Y	Y	-	-	0.33	0.34	-	0	0	0.67	+ -
11_1	WGS11	32654244	32743118	intron9	intron7			L1PA5(-)	LTR16C(+)	0.425	0.495	ins ctccggaatggggaaaaactggag	0	24	0.66	- +
12_1	WGS12	32576065	32780906	intron13	intron7			-	AluY(+)	0.305	0.425	hom T	1	0	0.66	- +
13_1	WGS13	32078820	32791078	intron44	intron7		Y	MER34A1(+)	L1MA4A(+)	0.37	0.52	hom GAA	3	0	0.64	- +
13_2	WGS13	32230080	32269974	intron43	intron43			-	-	0.29	0.33	-	0	0	0.66	+ -
14_1	WGS14	32397460	32631866	intron30	intron11	Y		-	MSTA(-)	0.32	0.44	ins g	0	1	0.66	- +
16_1	WGS16	32507475	32570503	intron18	intron15			-	-	0.24	0.34	homAT	2	0	0.68	- +
17_1	WGS17	31982991	37394262	intron44	upstream			-	-	0.26	0.41	hom AGTTT	5	0	0.68	- -
17_2	WGS17	32524074 (32523932-32524233)	37705331 (37705164-37705465)	intron17	upsrteam		Y	AluY(-)	AluY(+)	0.575	0.565	-	0	0	0.92	+ +
18_1	WGS18	32015057	32466431	intron44	intron23			MER5B(-)	-	0.385	0.39	hom TTA	3	0	0.67	- +
19_1	WGS19	32380675	32384334	exon34	intron33			-	-	0.31	0.3	hom TGTT	4	0	0.69	- -
19_2	WGS19	32384081	32391653	intron33	intron30			(AATTTAT)n(+)	-	0.205	0.33	hom AA	2	0	0.68	+ +
20_1	WGS20	32373205	32384658	intron34	intron33			-	-	0.365	0.29	ins taatt	0	5	0.68	- +
21_1	WGS21	32171377	32299722	intron44	intron42		Y	-	MIR(+)	0.335	0.4	-	0	0	0.68	- +
22_1	WGS22	31694596	31880178	intron52	intron47		Y	L1MA2(+)	-	0.24	0.235	ins atgtttattttctgcaca	0	18	0.69	+ -
22_2	WGS22	31700731	32016802	intron52	intron44			-	L2a(+)	0.275	0.35	ins [chrX_31880100_31880194_+]actgacatagca	0	12	0.66	+ -
22_3	WGS22	31873301	32041268	intron48	intron44		Y	-	Tigger1(-)	0.42	0.465	hom T	1	0	0.66	- +
23_1	WGS23	31796089	32288605	intron50	intron42			L2(-)	L2(+)	0.355	0.395	ins TTTG	0	4	0.67	- -
23_2	WGS23	32286472	32289016	intron43	intron42			-	MER41-int(+)	0.425	0.38	ins gtgtgag	0	7	0.67	+ +
24_1	WGS24	31622535	32222672	intron55	intron43			MLT1A(+)	-	0.395	0.36	hom TTA	3	0	0.66	- +
25_1	WGS25	32066307	36315168	intron44	upstream(CFAP47:intron56)			-	L4_A_Mam(+)	0.345	0.315	homTTTAA	5	0	0.67	+ -
25_2	WGS25	31749465 (31749147-31750560)	36597300 (36597028-36597684)	intron51	upstream	Y		L1PA3(-)	L1PA3(-)	0.375	0.345	-	0	0	0.96	- +
26_1	WGS26	31571013	32148550	intron55	intron44			-	-	0.29	0.29	ins ttttatgtttt	0	11	0.67	- +
26_2	WGS26	31628766	31688783	intron54	intron52			-	L1PA5(+)	0.345	0.4	ins gt	0	2	0.66	+ -
27_1	WGS27	31524960	31724509	intron55	intron52		Y	-	-	0.385	0.315	ins tatata	0	6	0.67	- -
27_2	WGS27	31525009	32052706	intron55	intron44		Y	-	MamRTE1(+)	0.35	0.345	ins gtgcccaccttcc	0	13	0.67	+ +
28_1	WGS28	31642814	32014247	intron54	intron44			-	-	0.405	0.31	hom T	1	0	0.68	- +
29_1	WGS29	31988110	35548151	intron44	upstream			-	AluSz(+)	0.365	0.46	ins agg	0	3	0.63	+ +
29_2	WGS29	31483049 (31483040-31483345)	35418217 (35417960-35418257)	intron57	upstream	Y	Y	AluY(-)	AluYa5(+)	0.445	0.465	-	0	0	0.92	- -
30_1	WGS30	28569026	31937257	downstream	intron45			AluSq2(+)	-	0.435	0.295	hom A	1	0	0.66	+ +
30_2	WGS30	28414874 (28414860-28415171)	31831771 (31831599-31831901)	downstream	intron49	Y	Y	AluY(+)	AluY(-)	0.445	0.54	-	0	0	0.86	- -
31_1	WGS31	28383006	28483639	downstream	downstream(IL1RAPL1:intron1)			-	AluY(+)	0.255	0.53	hom TG	2	0	0.63	+ -
31_2	WGS31	28669493	31955200	downstream	intron45	Y		AluSz(+)	-	0.51	0.41	hom GCAT	4	0	0.65	+ +
31_3	WGS31	28281004 (28280887-28281184)	31831752 (31831599-31831901)	downstream	intron49	Y	Y	AluSz(+)	AluY(-)	0.55	0.535	-	0	0	0.85	- -
32_1	WGS32	31748963	31895534	intron51	intron47	Y		MIRb(-)	-	0.365	0.325	hom AT	2	0	0.66	- +
33_1	WGS33	31742425	chrY:9794284	intron51	interchromosal		Y	Tigger1(-)	-	0.405	0.45	hom GGA	3	0	0.66	- +
33_2	WGS33	31864122	31866333	intron48	intron48			Charlie2b(+)	MER31-int(+)	0.315	0.485	hom CA	2	0	0.66	+ -
33_3	WGS33	31866421	chrY:9647826	intron48	interchromosal			MER31-int(+)	-	0.405	0.5	hom CTAGGTA	7	0	0.66	+ -
36_1	WGS36	31581115	35927062	intron55	upstream			-	AluJb(+)	0.39	0.475	hom TTGC	4	0	0.65	+ +
36_2	WGS36	35838912	35860237	upstream	upstream		Y	MER4-int(-)	-	0.265	0.455	-	0	0	0.67	+ -
36_3	WGS36	35843710	35873555	upstream	upstream	Y		L1PA16(-)	L1MB3(-)	0.335	0.315	ins gtaac	0	5	0.67	- +
36_4	WGS36	31329912 (31329690-31329999)	35836792 (35836589-35836918)	intron61	upstream	Y		AluSc(+)	AluSp(-)	0.49	0.545	-	0	0	0.82	- -
38_1	WGS38	31347172	31392919	intron61	intron60			L1MA4A(-)	-	0.315	0.345	hom TGCAT	5	0	0.66	- +
39_1	WGS39	30848088	31209580	upstream	exon65	Y		-	-	0.385	0.455	hom G	1	0	0.66	- +
40_1	WGS40	31567450	34038113	intron55	upstream			L1MD1(-)	-	0.325	0.245	hom TCTG	4	0	0.68	+ -
40_2	WGS40	31831842 (31831599-31831901)	33890225 (33890054-33890349)	intron49	upstream	Y		AluY(-)	AluY(-)	0.47	0.53	-	0	0	0.87	- +
34_1	WGS34	31654248	31673943	intron54	intron53			-	-	0.29	0.35	hom TG	2	0	0.68	- +
37_1	WGS37	31157863	31531982	intron55	intron74			AluJr4(-)	L1HS(+)	0.47	0.385	ins c	0	1	0.65	- +
1 Lower cases represent insertion; Upper case represent homology sequence.
